# Supplementary material
Source: Elsevier journal article supplement (https://www.sciencedirect.com/science/article/pii/S0210480614000722)
Supplement: mmc1 [file S0210480614000722:mmc1.docx]

**Tabla 1. Patrones histológicos y resultados oncológicos de las series de CCT notificadas.**

| ***Primer Autor***  ***(no. de referencia)*** | ***Periodo*** | ***Pacientes(No)*** | ***Media de edad (años)*** | ***Marcadores*** | ***Dimensión de EI media***  ***(mm)*** | ***FSE*** | ***Cirugía*** | ***Indicación*** | ***Histología*** | ***Recurrencia Local*** | ***Seguimiento***  ***(Meses)*** |
| --- | --- | --- | --- | --- | --- | --- | --- | --- | --- | --- | --- |
| **De Stefani (21)** | 2004-2011 | 23 | 30±11,1 | Normal | 14±5,2 | 21 benignos  2 malignos | 21 CCT  2 OR | **Electiva** | 5 Tumores de células de Leydig  4 Quiste epidermoide  2 Seminoma  3 Formaciones de cicatriz (flogosis)  2 Teratomas maduros  2 Tejidos seminales normales  1 Mesotelioma  1 Tumor de células de Sertoli  1 Necrosis hemorrágica  1 Quiste simple  1 Quiste congénito | 1 (después de CCT) | 35±15 |
| **Steiner (6)** | 1994-2002 | 18  **12** | 29,9 (0,4-58)  **33,6 (23-41)** | Normal  **-** | 11,5 (3-24)  **17,1 (6-30)** | 18 benignos  **-** | 18 CCT  **12 CCT** | **Electiva**  **Imperativa** | 10 Tumores de células de Leydig  2 Tumores de células de Sertoli  3 Quiste epidermoide  2 Pseudotumores fibróticos  1 Tumor adenomatoide  **8 Seminomas**  **2 Tumores de células de Leydig**  **1 Teratoma Maduro**  **2 Tumores mixtos de células germinales**  **1 Pseudotumor fibrótico** | 0  **1 (Después de rechazo de RT postoperatoria testicular)** | 35,7(12-91)  **59,8 (10-105)** |
| **Carmignani (7)** | 2000-2002 | 10 **(1 monórquido)** | 41 (5 - 76) | 5> hCG  4> αFP | 1,14 (0.5-3,1) | 8 benignos  2 benignos/R1 | 7 CCT  3 OR | **Electiva en 9 casos e**  ***Imperativa en 1 caso (paciente monórquido)*** | 3 Fibrosis  2 Infracciones  2 Tumores de células de Leydig (R1)  1 Hiperplasia de células de Leydig  1 Hiperplasia mesotelial  1 Tumor adenomatoide con abscesos multifocales | 0 | 9 (1-19) |
| Carmignani **(14)** | 1987-2006 | 23  (2 monórquidos) | 35 (5 - 61) | FSH y LH alta en 4 pacientes | 11,4 (5-31) | 22 benignos  1 maligno | 22 CCT  2 disecciones de ganglios linfáticos retroperitoneales (en caso de NSCGT) | **Electiva en 21 casos e imperativa en 2 casos (pacientes monórquidos)** | 20 Tumores de células de Leydig  1 tumor estromal no maligno  1 Linfoma de células B grandes | 0 | 47 (3-230) |
| Gentile **(18)** | 2009-2012 | 15 | 44,4 ±18,7 | normal | 0,95 ±0,44 | 13 benignos  1 maligno | 13 CCT  2 OR | **Electiva** | 5 Tumores de células de Leydig  2 Flogosis  1 Quiste epidermoide  1 Tumor de células de Sertoli  1 Tumor adenomatoide  1 Seminoma  1 Fibromixoide  1 Liposarcoma  1 Quiste dermoide  1 Abscesos  1 Hematoma | 0 | 19,6±11,1 |
| Shilo **(20)** | 1994-2009 | 16 | 32,3 ±12,3 | normal | 16,4±5,9  (tamaño pathológico) | 11 benignos  5 malignos | 11 CCT  5 OR | **Electiva** | 4 Tumores de células Leydig  2 Quistes epidermoides  3 Seminomas  1 Tumor adenomatoide  1 Tumor de células de Sertoli  1 Teratoma  1 Carcinoma embrionario  1 Quiste  1 Fibrosis focal | 2 hematomas paratesticulares pequeños | 48 (30-68) |
